# Supplementary material for: Enhancing SMM properties via axial distortion of MnIII3 clusters
Source: Royal Society of Chemistry journal article supplement (doi:10.1039/b811796a), 2008-01-01

Figure S1.  $\chi_M/T$  versus T for complex **2** measured with a 3.5 G ac field oscillating at the indicated frequencies. The inset shows  $\chi_M/T$  versus T.

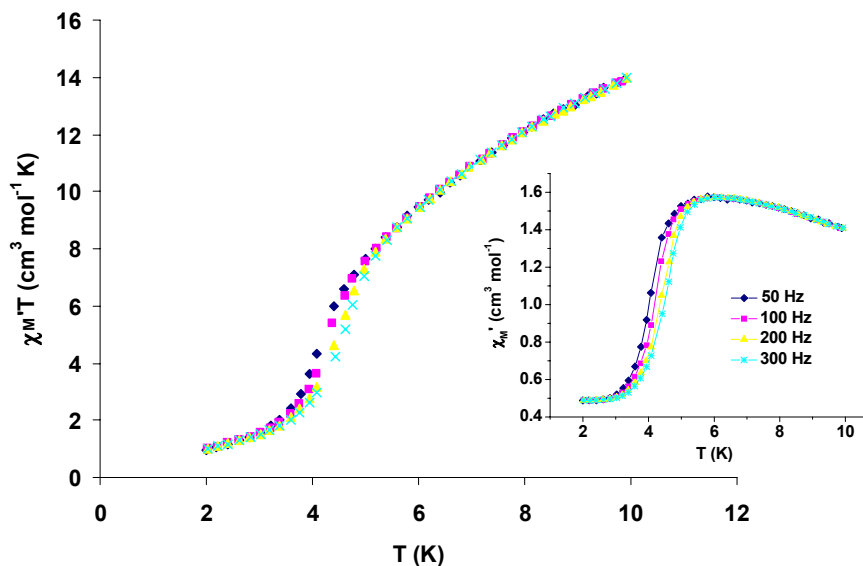

Figure S2.  $\chi_M$  versus T for complex **2**. The inset shows the 50-5 K temperature range.

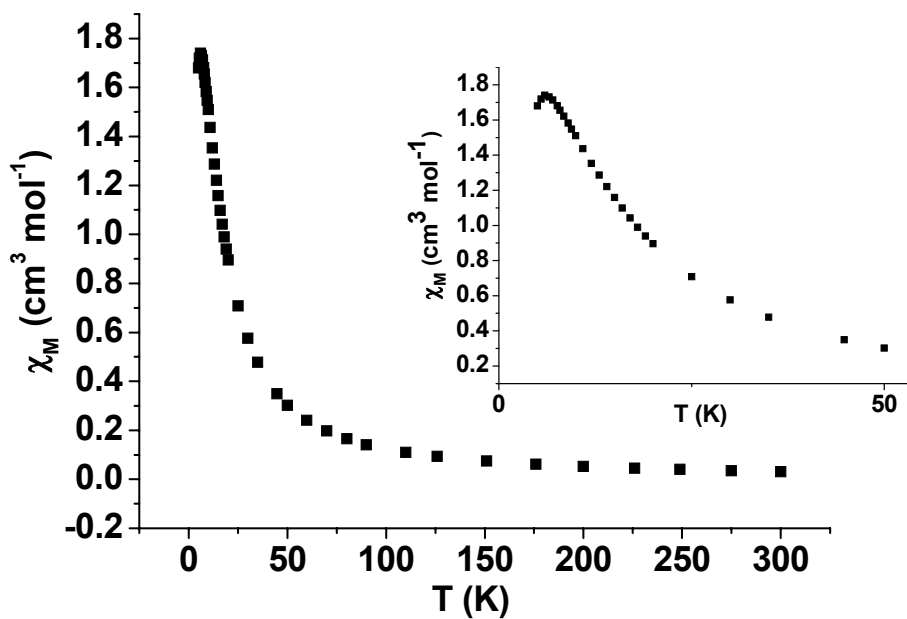

Figure S3.  $M/N\beta$  versus  $H/T$  for complex **2** in the 2-7 K and 3-7 T temperature and field ranges. The solid lines are a guide for the eye.

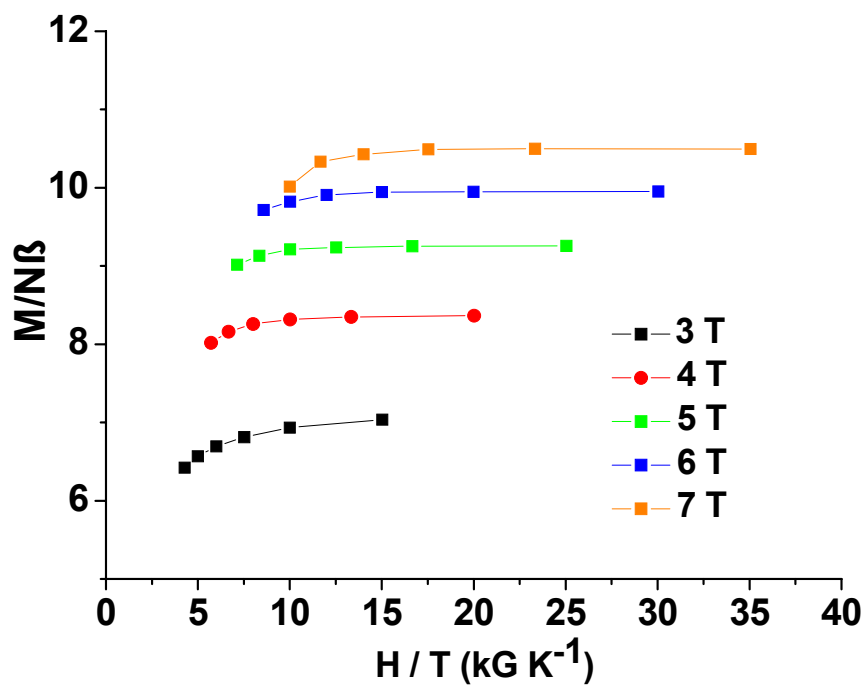

Figure S4. Arrhenius plot from combined ac out-of-phase measurements on a powdered crystalline sample and ac relaxation measurements on a single crystal.

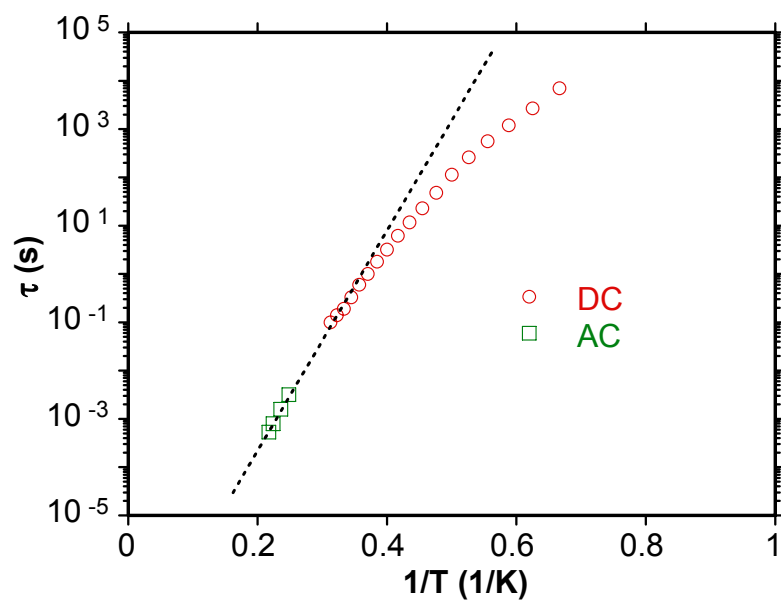

Supplement: b811796a.pdf [file b811796a.pdf]
